# Supplementary material for: Ice core evidence for decoupling between midlatitude atmospheric water cycle and Greenland temperature during the last deglaciation
Source: Copernicus journal article supplement (doi:10.5194/cp-14-1405-2018), 2018-10-08
Supplement: Supplementary file 1 [file cp-14-1405-2018-supplement.zip]

Archive with 3 entries (3 files):
- Supplementary_data.xlsx
- cp-14-1405-2018-supplement-title-page.pdf
- Supplementary online material_landais.pdf
