# Supplementary material for: Ice core evidence for decoupling between midlatitude atmospheric water cycle and Greenland temperature during the last deglaciation
Source: Copernicus journal article supplement (doi:10.5194/cp-14-1405-2018), 2018-10-08
Supplement: Supplementary file 1 [file cp-14-1405-2018-supplement.zip › cp-14-1405-2018-supplement-title-page.pdf]

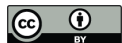

## *Supplement of*

# **Ice core evidence for decoupling between midlatitude atmospheric water cycle and Greenland temperature during the last deglaciation**

**Amaëlle Landais et al.**

*Correspondence to:* Amaëlle Landais ([amaelle.landais@lsce.ipsl.fr](mailto:amaelle.landais@lsce.ipsl.fr))

- [cp-14-1405-2018-supplement-title-page.pdf](#)
- [Supplementary online material\\_landais.pdf](#)
- [Supplementary\\_data.xlsx](#)

The copyright of individual parts of the supplement might differ from the CC BY 4.0 License.
