# Supplementary material for: Ice core evidence for decoupling between midlatitude atmospheric water cycle and Greenland temperature during the last deglaciation
Source: Copernicus journal article supplement (doi:10.5194/cp-14-1405-2018), 2018-10-08
Supplement: Supplementary file 1 [file cp-14-1405-2018-supplement.zip › Supplementary_data.xlsx]

## Sheet: d-excess
depth_top (m)	depth_bot (m)	d-excess (permil)
1600.5	1601.05	3.55971
1601.05	1601.6	3.86378
1601.6	1602.15	4.68871
1602.15	1602.7	5.5438
1602.7	1603.25	3.17699
1603.25	1603.8	3.29839
1603.8	1604.35	3.41941
1604.35	1604.9	4.37168
1604.9	1605.45	7.33378
1605.45	1606	7.59231
1606	1606.55	7.3076
1606.55	1607.1	7.41785
1607.1	1607.65	7.36995
1607.65	1608.2	7.79196
1608.2	1608.75	7.51564
1608.75	1609.3	7.76025
1609.3	1609.85	6.32488
1609.85	1610.4	6.87612
1610.4	1610.95	7.59998
1610.95	1611.5	8.23053
1611.5	1612.05	7.05921
1612.05	1612.6	7.71192
1612.6	1613.15	7.90661
1613.15	1613.7	6.3294
1613.7	1614.25	7.65133
1614.25	1614.8	7.92493
1614.8	1615.35	8.06662
1615.35	1615.9	7.35576
1615.9	1616.45	8.1957
1617	1617.55	7.52386
1617.55	1618.1	7.36795
1618.1	1618.65	7.61918
1618.65	1619.2	7.16297
1619.2	1619.75	8.35288
1619.75	1620.3	7.43646
1620.3	1620.85	7.00409
1620.85	1621.4	7.6993
1621.4	1621.95	8.67782
1621.95	1622.5	7.68173
1622.5	1623.05	6.8153
1623.05	1623.6	8.14649
1623.6	1624.15	8.10546
1624.15	1624.7	8.56998
1624.7	1625.25	8.1567
1625.25	1625.8	8.26581
1625.8	1626.35	7.2098
1626.35	1626.9	7.73307
1626.9	1627.45	8.50343
1627.45	1628	8.15751
1628	1628.55	7.35672
1628.55	1629.1	8.48757
1629.1	1629.65	8.69321
1629.65	1630.2	8.07429
1630.2	1630.75	8.79801
1630.75	1631.3	7.51963
1631.3	1631.85	7.98526
1631.85	1632.4	8.51274
1632.4	1632.95	9.15993
1632.95	1633.5	8.98511
1633.5	1634.05	8.2383
1634.6	1635.15	8.4641
1635.15	1635.7	8.33275
1635.7	1636.25	8.20769
1636.25	1636.8	8.71757
1636.8	1637.35	7.91242
1637.35	1637.9	8.81262
1637.9	1638.45	7.55236
1638.45	1639	8.02428
1639	1639.55	7.65138
1639.55	1640.1	6.84828
1640.1	1640.65	6.81912
1640.65	1641.2	6.72339
1641.2	1641.75	6.81313
1641.75	1642.3	7.4425
1642.3	1642.85	7.94556
1642.85	1643.4	7.72603
1643.4	1643.95	7.00653
1643.95	1644.5	7.04915
1644.5	1645.05	6.84045
1645.05	1645.6	6.48148
1645.6	1646.15	7.03352
1646.15	1646.7	7.35217
1646.7	1647.25	6.92813
1647.25	1647.8	7.88686
1647.8	1648.35	7.17376
1648.35	1648.9	5.54415
1648.9	1649.45	7.42613
1649.45	1650	6.05521
1650	1650.55	6.42373
1650.55	1651.1	6.97684
1651.1	1651.65	6.35722
1651.65	1652.2	7.25201
1652.75	1653.3	7.85558
1653.3	1653.85	8.29838
1653.85	1654.4	7.15162
1654.4	1654.95	7.25014
1654.95	1655.5	8.04997
1655.5	1656.05	6.09763
1656.05	1656.6	7.844
1656.6	1657.15	6.41196
1657.7	1658.25	6.17557
1658.25	1658.8	7.25808
1658.8	1659.35	6.60847
1659.35	1659.9	7.51914
1660.45	1661	6.98486
1661.55	1662.1	6.45775
1662.1	1662.65	6.8672
1662.65	1663.2	7.78898
1663.2	1663.75	5.94432
1663.75	1664.3	6.45724
1664.3	1664.85	6.10415
1664.85	1665.4	6.23107
1665.4	1665.95	6.07778
1665.95	1666.5	7.59226
1666.5	1667.05	7.32621
1667.05	1667.6	6.85147
1667.6	1668.15	6.10282
1668.15	1668.7	7.35978
1668.7	1669.25	6.83081
1669.25	1669.8	6.23641
1669.8	1670.35	6.21281
1670.35	1670.9	6.19075
1670.9	1671.45	6.63224
1671.45	1672	6.51891
1672	1672.55	7.342
1672.55	1673.1	6.12238
1672.55	1673.1	6.23203
1673.1	1673.65	5.72479
1673.65	1674.2	6.31363
1674.2	1674.75	5.99131
1674.75	1675.3	6.98252
1675.3	1675.85	6.43812
1675.85	1676.4	4.88258
1676.95	1677.5	6.50012
1677.5	1678.05	4.67005
1678.05	1678.6	6.27783
1678.6	1679.15	5.62211
1679.15	1679.7	6.5884
1679.7	1680.25	6.65928
1680.25	1680.8	7.79736
1680.8	1681.35	7.07763
1681.35	1681.9	7.18886
1681.9	1682.45	6.76137
1682.45	1683	5.41366
1683	1683.55	6.90833
1683.55	1684.1	5.56631
1684.1	1684.65	5.66665
1684.65	1685.2	6.21775
1685.2	1685.75	6.18528
1685.75	1686.3	6.35668
1686.3	1686.85	5.24469
1686.85	1687.4	6.37469
1687.4	1687.95	5.9388
1687.95	1688.5	5.77351
1688.5	1689.05	6.67786
1689.05	1689.6	6.33942
1689.6	1690.15	5.9753
1690.15	1690.7	5.50205
1690.7	1691.25	6.09425
1691.25	1691.8	5.49509
1691.8	1692.35	7.48574
1692.35	1692.9	5.81212
1692.9	1693.45	6.20461
1693.45	1694	5.30558
1694	1694.55	7.38262
1694.55	1695.1	6.37445
1695.1	1695.65	5.68575
1696.2	1696.75	5.60615
1696.75	1697.3	6.72505
1697.3	1697.85	7.44748
1697.85	1698.4	6.64237
1698.4	1698.95	5.65556
1698.95	1699.5	6.20727
1699.5	1700.05	5.85104
1700.05	1700.6	5.77316
1700.6	1701.15	5.79843
1701.15	1701.7	5.45151
1701.7	1702.25	6.77661
1702.25	1702.8	7.54182
1702.8	1703.35	6.98569
1703.35	1703.9	6.76718
1703.9	1704.45	7.18169
1704.45	1705	6.99993
1705	1705.55	6.17276
1705.55	1706.1	5.48813
1706.1	1706.65	7.28321
1706.65	1707.2	5.82572
1707.2	1707.75	5.65648
1707.75	1708.3	5.72937
1708.3	1708.85	6.22256
1708.85	1709.4	6.28507
1709.4	1709.95	5.43064
1709.95	1710.5	5.16561
1710.5	1711.05	5.39455
1711.6	1712.15	6.35929
1712.15	1712.7	5.28334
1712.7	1713.25	5.52605
1713.25	1713.8	5.89499
1713.8	1714.35	7.01274
1714.35	1714.9	5.65942
1714.9	1715.45	5.91122
1715.45	1716	5.22413
1716	1716.55	4.98883
1716.55	1717.1	4.21053
1717.1	1717.65	5.87939
1717.65	1718.2	3.9197
1718.2	1718.75	5.84983
1718.75	1719.3	6.23506
1719.3	1719.85	5.42472
1719.85	1720.4	6.03941
1720.4	1720.95	6.68861
1720.95	1721.5	5.55744
1721.5	1722.05	4.84161
1722.05	1722.6	4.64655
1722.6	1723.15	5.98142
1723.15	1723.7	5.31654
1723.7	1724.25	4.99494
1724.25	1724.8	5.0708
1724.8	1725.35	5.32762
1725.35	1725.9	6.41328
1726.45	1727	5.79724
1727	1727.55	5.69796
1727.55	1728.1	5.68916
1728.1	1728.65	4.88042
1728.65	1729.2	4.8142
1729.2	1729.75	4.65367
1729.75	1730.3	6.1897
1729.75	1730.3	6.45708
1730.3	1730.85	6.54292
1730.85	1731.4	5.93731
1731.4	1731.95	5.62382
1731.95	1732.5	4.95714
1732.5	1733.05	5.70271
1733.05	1733.6	6.56175
1733.6	1734.15	6.25923
1734.15	1734.7	7.16019
1734.7	1735.25	7.05929
1735.25	1735.8	8.37649
1735.8	1736.35	6.78735
1736.35	1736.9	6.20228
1736.9	1737.45	6.11606
1737.45	1738	6.07114
1738	1738.55	6.2998
1738.55	1739.1	5.48545
1739.1	1739.65	4.71786
1739.65	1740.2	5.41033
1740.2	1740.75	6.6824
1740.75	1741.3	5.02281
1741.3	1741.85	4.49711
1741.85	1742.4	5.1691
1742.4	1742.95	5.88067
1742.95	1743.5	5.65765
1743.5	1744.05	4.61432
1744.05	1744.6	4.96851
1745.15	1745.7	5.64676
1745.7	1746.25	6.74041
1746.25	1746.8	6.10925
1746.8	1747.35	6.1534
1747.35	1747.9	5.4508
1747.9	1748.45	5.51544
1748.45	1749	7.01436
1749	1749.55	6.20554
1749.55	1750.1	6.5499
1750.1	1750.65	5.7628
1750.65	1751.2	5.87084
1751.2	1751.75	5.66054
1751.75	1752.3	5.83582
1752.3	1752.85	5.28149
1752.85	1753.4	4.03606
1753.4	1753.95	5.29991
1753.95	1754.5	4.55187
1754.5	1755.05	6.33981
1755.05	1755.6	5.53023
1755.6	1756.15	6.42874
1756.15	1756.7	6.34802
1756.7	1757.25	6.51648
1757.25	1757.8	5.72453
1757.8	1758.35	5.24183
1758.35	1758.9	6.09135
1758.9	1759.45	6.52226
1759.45	1760	6.07465
1760	1760.55	6.24739
1760.55	1761.1	7.18207
1761.1	1761.65	6.64829
1761.65	1762.2	6.20096
1762.2	1762.75	6.61937
1762.75	1763.3	5.93635
1763.85	1764.4	7.00503
1764.4	1764.95	7.35072
1764.95	1765.5	7.07406
1765.5	1766.05	7.6028
1766.05	1766.6	5.1426
1766.6	1767.15	6.37435
1767.15	1767.7	7.0914
1767.7	1768.25	6.04862
1768.25	1768.8	7.12827
1768.8	1769.35	6.27626
1769.35	1769.9	6.52141
1769.9	1770.45	5.94234
1770.45	1771	6.34649
1771	1771.55	6.2847
1771.55	1772.1	6.72956
1772.1	1772.65	5.5542
1772.65	1773.2	6.97565
1773.2	1773.75	5.75644
1773.75	1774.3	7.62155
1774.3	1774.85	6.833
1774.85	1775.4	5.74194
1775.4	1775.95	5.95424
1775.95	1776.5	6.87087
1776.5	1777.05	5.77751
1777.05	1777.6	7.1611
1777.6	1778.15	6.54441
1778.15	1778.7	6.95246
1778.7	1779.25	7.67232
1779.25	1779.8	6.39012
1779.8	1780.35	6.67241
1780.9	1781.45	6.11066
1781.45	1782	6.5798
1782	1782.55	6.29852
1782.55	1783.1	6.45662
1783.1	1783.65	7.42789
1783.65	1784.2	4.44582
1784.2	1784.75	3.97517
1784.75	1785.3	5.61627
1785.3	1785.85	4.54365
1785.85	1786.4	7.45677
1786.4	1786.95	6.83741
1786.95	1787.5	7.4723
1787.5	1788.05	7.03773
1788.05	1788.6	7.32737
1788.6	1789.15	5.98493
1789.15	1789.7	6.39152
1789.7	1790.25	6.78633
1790.25	1790.8	6.04188
1790.8	1791.35	5.00289
1791.35	1791.9	3.84483
1791.9	1792.45	2.5745
1792.45	1793	4.04477
1793	1793.55	4.21324
1793.55	1794.1	7.34583
1794.1	1794.65	7.10699
1794.65	1795.2	6.46116
1795.75	1796.3	7.44151
1796.3	1796.85	8.57138
1796.85	1797.4	8.33779
1797.4	1797.95	6.5414
1797.95	1798.5	6.2481
1798.5	1799.05	7.1808
1799.6	1800.15	7.3749
1800.15	1800.7	7.80117
1800.7	1801.25	7.98516
1801.25	1801.8	7.05096
1801.8	1802.35	6.57372
1802.35	1802.9	7.4058
1802.9	1803.45	7.97968
1803.45	1804	7.54674
1804	1804.55	6.43798
1804.55	1805.1	6.77876
1805.1	1805.65	7.26091
1805.65	1806.2	7.90856
1806.2	1806.75	7.7606
1806.75	1807.3	6.75258
1807.3	1807.85	6.26347
1807.85	1808.4	7.976
1808.4	1808.95	5.90014
1808.95	1809.5	6.03625
1809.5	1810.05	6.28764
1810.05	1810.6	6.7895
1810.6	1811.15	8.11066
1811.15	1811.7	6.05601
1811.7	1812.25	6.78795
1812.25	1812.8	6.62862
1812.8	1813.35	5.75497
1813.35	1813.9	7.04933
1813.9	1814.45	7.961
1814.45	1815	8.50104
1815	1815.55	8.24097
1816.1	1816.65	8.08941
1816.65	1817.2	7.27936
1817.2	1817.75	7.66288
1817.75	1818.3	8.05589
1818.3	1818.85	7.75746
1818.85	1819.4	7.45249
1819.4	1819.95	7.07234
1819.95	1820.5	6.82392
1820.5	1821.05	6.32168
1821.05	1821.6	6.34443
1821.6	1822.15	5.53355
1822.15	1822.7	6.76907
1822.7	1823.25	6.32187
1823.25	1823.8	7.07865
1823.8	1824.35	6.51348
1824.35	1824.9	7.42634
1824.9	1825.45	6.43869
1825.45	1826	6.16314
1826	1826.55	6.54889
1826.55	1827.1	6.82267
1827.1	1827.65	7.02836
1827.65	1828.2	6.62454
1828.2	1828.75	7.3051
1828.75	1829.3	7.62799
1829.3	1829.85	7.56041
1829.85	1830.4	7.30331
1830.4	1830.95	7.64997
1830.95	1831.5	7.23369
1831.5	1832.05	7.76902
1832.05	1832.6	8.13924
1832.6	1833.15	7.14672
1833.15	1833.7	7.35594
1833.15	1833.7	7.14017
1833.7	1834.25	8.24817
1833.7	1834.25	6.96653
1834.25	1834.8	7.18782
1834.8	1835.35	7.34441
1835.35	1835.9	6.48546
1835.9	1836.45	6.60772
1836.45	1837	5.68861
1837	1837.55	7.25648
1837.55	1838.1	6.22312
1838.1	1838.65	5.35215
1838.65	1839.2	5.36167
1839.2	1839.75	5.65899
1839.75	1840.3	6.31688
1840.3	1840.85	5.94333
1840.85	1841.4	5.42601
1841.4	1841.95	6.31471
1841.95	1842.5	6.24123
1842.5	1843.05	6.15567
1843.05	1843.6	7.9156
1843.6	1844.15	7.13499
1844.15	1844.7	7.42691
1844.7	1845.25	7.82021
1845.25	1845.8	7.53538
1845.8	1846.35	7.02411
1846.35	1846.9	7.30059
1846.9	1847.45	6.99859
1847.45	1848	6.03913
1848	1848.55	7.04656
1848.55	1849.1	6.76707
1849.1	1849.65	7.85314
1849.65	1850.2	6.58569
1850.2	1850.75	7.88158
1850.75	1851.3	8.00649
1851.3	1851.85	6.65001
1851.85	1852.4	7.19919
1852.4	1852.95	7.16489
1852.95	1853.5	8.57432
1853.5	1854.05	7.82919
1854.05	1854.6	7.25854
1854.6	1855.15	7.59157
1855.15	1855.7	7.67263
1855.7	1856.25	7.56133
1856.25	1856.8	8.65733
1856.8	1857.35	6.61662
1857.35	1857.9	6.66371
1857.9	1858.45	7.48959
1858.45	1859	7.35181
1859	1859.55	7.93494
1859.55	1860.1	8.08743
1860.1	1860.65	7.23517
1860.65	1861.2	6.984
1861.2	1861.75	6.22625
1861.75	1862.3	4.6542
1862.3	1862.85	4.5568
1862.85	1863.4	3.03281
1863.4	1863.95	4.43354
1863.95	1864.5	4.85931
1864.5	1865.05	4.19422
1865.05	1865.6	3.98034
1865.6	1866.15	4.14009
1866.15	1866.7	4.373
1866.7	1867.25	3.63599
1867.25	1867.8	4.15238
1867.8	1868.35	3.19204
1868.35	1868.9	4.39451
1868.9	1869.45	5.25677
1869.45	1870	6.76934
1870	1870.55	7.75205
1870.55	1871.1	7.92823
1871.1	1871.65	7.0196
1871.65	1872.2	6.61534
1872.2	1872.75	6.4716
1872.75	1873.3	7.85339
1873.3	1873.85	8.02411
1873.85	1874.4	7.9994
1874.4	1874.95	6.81286
1874.95	1875.5	8.15455
1875.5	1876.05	7.0381
1876.05	1876.6	6.90117
1876.6	1877.15	8.40584
1877.15	1877.7	7.98495
1877.7	1878.25	8.32342
1878.25	1878.8	7.71292
1878.8	1879.35	8.41759
1879.35	1879.9	7.8774
1880.45	1881	8.84599
1881	1881.55	8.32999
1881.55	1882.1	8.05252
1882.1	1882.65	7.3577
1882.65	1883.2	5.50667
1883.2	1883.75	3.98202
1883.75	1884.3	4.07326
1884.3	1884.85	4.58716
1884.85	1885.4	3.69439
1885.4	1885.95	3.92782
1885.95	1886.5	2.91446
1886.5	1887.05	2.94495
1887.05	1887.6	3.82449
1887.6	1888.15	3.32404
1888.15	1888.7	3.98305
1888.7	1889.25	3.18571
1889.25	1889.8	4.09202
1889.8	1890.35	2.15641
1890.35	1890.9	2.53339
1890.9	1891.45	5.10276
1891.45	1892	7.5237
1892	1892.55	7.88073
1892.55	1893.1	7.75748
1893.1	1893.65	7.30565
1893.65	1894.2	8.05978
1894.2	1894.75	7.62726
1894.75	1895.3	7.69185
1895.3	1895.85	8.91207
1895.85	1896.4	7.82554
1896.4	1896.95	8.37574
1896.95	1897.5	8.87402
1897.5	1898.05	7.80725
1898.05	1898.6	8.1519
1898.6	1899.15	8.32449
1899.15	1899.7	7.41574
1899.7	1900.25	8.23415
1900.25	1900.8	8.25851
1900.8	1901.35	8.15566
1901.35	1901.9	8.01456
1901.9	1902.45	7.56283
1902.45	1903	8.10524
1903	1903.55	8.38248
1903.55	1904.1	7.22511
1903.55	1904.1	7.58149
1904.1	1904.65	8.23527
1904.65	1905.2	8.70211
1905.2	1905.75	8.13873
1905.75	1906.3	8.41192
1905.75	1906.3	8.27629
1906.3	1906.85	7.84022
1906.85	1907.4	7.82114
1907.4	1907.95	7.90831
1907.95	1908.5	8.2253
1908.5	1909.05	7.62742
1909.05	1909.6	7.95818
1909.6	1910.15	6.82808
1910.15	1910.7	6.15458
1910.7	1911.25	6.73056
1911.25	1911.8	7.03565
1911.8	1912.35	7.53735
1912.35	1912.9	8.28698
1913.45	1914	8.23056
1914	1914.55	7.20293
1914.55	1915.1	7.70316
1915.1	1915.65	7.05474
1915.65	1916.2	7.63957
1916.2	1916.75	8.19696
1916.75	1917.3	7.43445
1917.3	1917.85	7.17384
1917.85	1918.4	4.74971
1918.4	1918.95	4.84294
1918.95	1919.5	7.31405
1919.5	1920.05	7.39031
1920.05	1920.6	6.00083
1920.6	1921.15	7.0383
1921.15	1921.7	7.40795
1921.7	1922.25	9.11238
1922.25	1922.8	7.68737
1922.8	1923.35	6.41126
1923.35	1923.9	7.55693
1923.9	1924.45	6.22876
1924.45	1925	7.38513
1925	1925.55	7.81942
1925.55	1926.1	8.63956
1926.1	1926.65	7.84284
1926.65	1927.2	7.81282
1927.2	1927.75	7.00899
1927.75	1928.3	7.78573
1928.3	1928.85	7.60671
1928.85	1929.4	7.3419
1929.4	1929.95	7.04184
1929.95	1930.5	6.84376
1931.05	1931.6	7.55076
1931.6	1932.15	7.67522
1932.15	1932.7	8.65762
1932.7	1933.25	6.39469
1933.25	1933.8	8.00204
1933.8	1934.35	7.44988
1934.35	1934.9	8.08358
1934.9	1935.45	8.86951
1934.9	1935.45	8.38005
1935.45	1936	7.79303
1936	1936.55	8.22024
1936.55	1937.1	7.72289
1937.1	1937.65	7.97675
1937.65	1938.2	7.83326
1938.2	1938.75	8.02111
1938.75	1939.3	5.53375
1939.3	1939.85	6.96598
1939.85	1940.4	5.64882
1940.4	1940.95	5.96636
1940.95	1941.5	6.5622
1940.95	1941.5	5.24095
1941.5	1942.05	5.18485
1942.05	1942.6	5.99873
1942.6	1943.15	5.59973
1943.15	1943.7	5.76786
1943.7	1944.25	5.26573
1944.25	1944.8	4.21709
1944.8	1945.35	3.35885
1945.35	1945.9	4.06941
1945.9	1946.45	3.78634
1946.45	1947	4.03621
1947	1947.55	5.32319
1947.55	1948.1	3.42254
1948.1	1948.65	3.0257
1948.65	1949.2	3.13534
1949.2	1949.75	3.93101
1949.75	1950.3	4.18654
1950.3	1950.85	4.17332
1950.85	1951.4	3.96067
1951.4	1951.95	5.08281
1952.5	1953.05	7.92203
1953.6	1954.15	8.04389
1954.7	1955.25	6.80082
1955.8	1956.35	6.88837
1956.9	1957.45	8.42009
1958	1958.55	8.10032
1959.1	1959.65	7.83917
1960.2	1960.75	8.0459
1961.3	1961.85	6.14521
1962.4	1962.95	6.82677
1963.5	1964.05	7.29214
1964.6	1965.15	7.40609
1965.7	1966.25	4.41138
1966.8	1967.35	4.52787
1967.9	1968.45	5.03084
1969	1969.55	4.39538
1970.1	1970.65	4.70581
1971.2	1971.75	3.48947
1972.3	1972.85	5.15034
1973.4	1973.95	4.83068
1974.5	1975.05	8.08885
1975.6	1976.15	7.53696
1976.7	1977.25	7.45633
1977.8	1978.35	7.33249
1978.9	1979.45	6.50757
1980	1980.55	7.35196
1981.1	1981.65	7.07741
1982.2	1982.75	7.38271
1983.3	1983.85	7.89964
1984.4	1984.95	7.32066
1985.5	1986.05	7.92422
1986.6	1987.15	9.3507
1987.7	1988.25	8.20339
1988.8	1989.35	7.01656
1989.9	1990.45	5.61416
1991	1991.55	3.90854
1992.1	1992.65	2.51936
1993.2	1993.75	4.45131
1994.3	1994.85	3.80829
1995.4	1995.95	4.68459
1996.5	1997.05	6.79296
1997.6	1998.15	4.89656
1998.7	1999.25	4.27284
1999.8	2000.35	4.33721
2000.9	2001.45	3.30943
2002	2002.55	4.2837
2003.1	2003.65	4.01272
2004.2	2004.75	3.71498
2005.3	2005.85	3.57926
2006.4	2006.95	2.69355
2007.5	2008.05	3.63793
2008.05	2008.6	4.46879
2008.6	2009.15	3.93123
2009.15	2009.7	5.56945
2009.7	2010.25	8.20437
2010.25	2010.8	7.53302
2010.8	2011.35	7.8251
2011.35	2011.9	8.12555
2011.9	2012.45	8.26636
2012.45	2013	7.56234
2013	2013.55	8.19098
2013.55	2014.1	8.98499
2014.1	2014.65	8.78021
2014.65	2015.2	9.48696
2015.2	2015.75	9.05202
2015.75	2016.3	8.86334
2016.3	2016.85	8.05226
2016.85	2017.4	7.41469
2017.4	2017.95	7.29364
2017.95	2018.5	7.68517
2018.5	2019.05	9.33455
2019.05	2019.6	8.78642
2019.6	2020.15	7.49598
2020.15	2020.7	9.0275
2020.7	2021.25	8.26013
2021.25	2021.8	7.81354
2021.8	2022.35	7.531
2022.35	2022.9	6.73066
2022.9	2023.45	8.67768
2023.45	2024	9.12502
2024	2024.55	8.72324
2024.55	2025.1	8.27171
2025.1	2025.65	7.8703
2025.65	2026.2	7.80736
2026.2	2026.75	6.82304
2026.75	2027.3	6.89015
2027.3	2027.85	7.02171
2027.85	2028.4	6.57633
2028.4	2028.95	6.23491
2028.95	2029.5	6.93415
2029.5	2030.05	6.17058
2030.05	2030.6	5.30913
2030.6	2031.15	5.71515
2031.15	2031.7	7.54447
2031.7	2032.25	5.7709
2032.25	2032.8	5.45756
2032.8	2033.35	7.25289
2033.35	2033.9	7.23402
2033.9	2034.45	8.29576
2034.45	2035	5.76696
2035	2035.55	4.90405
2035.55	2036.1	5.46874
2036.1	2036.65	4.45464
2036.65	2037.2	4.51377
2037.2	2037.75	5.95105
2037.75	2038.3	6.49351
2038.3	2038.85	6.49592
2038.85	2039.4	4.75743
2039.4	2039.95	4.58824
2039.95	2040.5	3.50147
2040.5	2041.05	3.46063
2041.05	2041.6	4.5553
2041.6	2042.15	4.64152
2042.15	2042.7	4.2613
2042.7	2043.25	3.23274
2043.25	2043.8	3.72349
2043.8	2044.35	3.96276
2044.35	2044.9	3.6112
2044.9	2045.45	3.02296
2045.45	2046	4.14523
2046	2046.55	3.81894
2046.55	2047.1	3.65268
2047.1	2047.65	2.56832
2047.65	2048.2	3.90244
2048.2	2048.75	3.92396
2048.75	2049.3	4.69293
2049.3	2049.85	4.51119
2049.85	2050.4	4.26046
2050.4	2050.95	3.46723
2050.95	2051.5	5.0771
2051.5	2052.05	3.6386
2052.05	2052.6	3.83072
2052.6	2053.15	4.41294
2053.15	2053.7	4.39652
2053.7	2054.25	3.17998
2054.25	2054.8	4.49938
2054.8	2055.35	3.55636
2055.35	2055.9	4.46367
2055.9	2056.45	3.68308
2056.45	2057	3.48482
2057	2057.55	4.84398
2057.55	2058.1	4.71184
2058.1	2058.65	3.79638
2058.65	2059.2	5.36943
2059.2	2059.75	4.56763
2059.75	2060.3	5.17142
2060.3	2060.85	4.26571
2060.85	2061.4	3.70403
2061.4	2061.95	4.14711
2061.95	2062.5	3.54194
2062.5	2063.05	3.98093
2063.05	2063.6	3.76965
2063.6	2064.15	4.27639
2064.15	2064.7	4.03014
2064.7	2065.25	4.70243
2065.25	2065.8	3.44738
2065.8	2066.35	4.50667
2066.35	2066.9	4.4555
2066.9	2067.45	4.35303
2067.45	2068	3.83087
2068	2068.55	4.09537
2068.55	2069.1	4.20416
2069.1	2069.65	3.93874
2069.65	2070.2	4.42362
2070.2	2070.75	7.40495
2070.75	2071.3	7.18742
2071.3	2071.85	6.07095
2071.85	2072.4	7.34146
2072.4	2072.95	7.18133
2072.95	2073.5	8.2451
2073.5	2074.05	5.95322
2074.05	2074.6	8.08852
2074.6	2075.15	8.05561
2075.15	2075.7	8.64648
2075.7	2076.25	7.60455
2076.25	2076.8	6.47331
2076.8	2077.35	8.63162
2077.35	2077.9	8.47286
2077.9	2078.45	9.76877
2078.45	2079	8.68446
2079	2079.55	8.53402
2079.55	2080.1	9.00004
2080.1	2080.65	8.00948
2080.65	2081.2	7.72462
2081.2	2081.75	7.57847
2081.75	2082.3	7.61488
2082.3	2082.85	8.22532
2082.85	2083.4	7.27703
2083.4	2083.95	8.84515
2083.95	2084.5	7.56626
2084.5	2085.05	8.33592
2085.05	2085.6	8.14779
2085.6	2086.15	9.15162
2086.15	2086.7	8.58666
2086.7	2087.25	8.01119
2087.25	2087.8	7.82369
2087.8	2088.35	7.02139
2088.35	2088.9	7.56423
2088.9	2089.45	8.07153
2089.45	2090	7.95108
2090	2090.55	6.85835
2090.55	2091.1	6.86111
2091.1	2091.65	7.9898
2091.65	2092.2	7.4687
2092.2	2092.75	8.53562
2092.75	2093.3	7.8047
2093.3	2093.85	7.57713
2093.85	2094.4	8.26979
2094.4	2094.95	7.9852
2094.95	2095.5	8.2002
2095.5	2096.05	7.24847
2096.05	2096.6	5.46488
2096.6	2097.15	4.04073
2097.15	2097.7	5.00513
2097.7	2098.25	4.4386
2098.25	2098.8	3.08698
2098.8	2099.35	4.64105
2099.35	2099.9	5.94988
2099.9	2100.45	6.65369
2100.45	2101	6.94881
2101	2101.55	6.97143
2101.55	2102.1	6.29037
2102.1	2102.65	6.97986
2102.65	2103.2	6.35735
2103.2	2103.75	6.22129
2103.75	2104.3	5.2034
2104.3	2104.85	7.18296
2104.85	2105.4	6.20274
2105.4	2105.95	7.60216
2105.95	2106.5	7.13415
2106.5	2107.05	7.65082
2107.05	2107.6	6.65965
2107.6	2108.15	5.95128
2108.15	2108.7	6.87973
2108.7	2109.25	7.17272
2109.25	2109.8	6.75749
2109.8	2110.35	7.05258
2110.35	2110.9	6.33417
2110.9	2111.45	6.15814
2111.45	2112	4.76668
2112	2112.55	4.45957
2112.55	2113.1	4.36059
2113.1	2113.65	3.68184
2113.65	2114.2	5.28881
2114.2	2114.75	4.64463
2114.75	2115.3	3.18861
2115.3	2115.85	5.21445
2115.85	2116.4	5.53577
2116.4	2116.95	5.53427
2116.95	2117.5	5.74783
2117.5	2118.05	4.95658
2118.05	2118.6	4.72006
2118.6	2119.15	4.51852
2119.15	2119.7	4.19519
2119.7	2120.25	4.21572
2120.25	2120.8	4.18892
2120.8	2121.35	3.87742
2121.35	2121.9	4.75145
2121.9	2122.45	4.22018
2122.45	2123	4.32364
2123	2123.55	3.53253
2123.55	2124.1	4.64324
2124.1	2124.65	6.86992
2124.65	2125.2	7.67385
2125.2	2125.75	7.16035
2125.75	2126.3	7.79443
2126.3	2126.85	7.26275
2126.85	2127.4	7.98613
2127.4	2127.95	7.49477
2127.95	2128.5	8.15498
2128.5	2129.05	7.99607
2129.05	2129.6	7.00913
2129.6	2130.15	8.07644
2130.15	2130.7	6.62751
2130.7	2131.25	8.0439
2131.25	2131.8	7.4595
2131.8	2132.35	8.11677
2132.35	2132.9	8.08981
2132.9	2133.45	7.47698
2133.45	2134	7.66428
2134	2134.55	6.46555
2134.55	2135.1	6.41172
2135.1	2135.65	6.7989
2135.65	2136.2	6.25333
2136.2	2136.75	4.54575
2136.75	2137.3	5.10852
2137.3	2137.85	5.8705
2137.85	2138.4	6.09917
2138.95	2139.5	5.41392
2139.5	2140.05	5.7992
2140.05	2140.6	5.81348
2140.6	2141.15	5.41266
2141.15	2141.7	4.68347
2141.7	2142.25	4.82275
2142.25	2142.8	5.48252
2142.8	2143.35	4.2076
2143.35	2143.9	4.41686
2143.9	2144.45	3.55748
2144.45	2145	3.23497
2145	2145.55	3.82829
2145.55	2146.1	4.54271
2146.1	2146.65	4.24677
2146.65	2147.2	4.33304
2147.2	2147.75	4.66331
2147.75	2148.3	4.44122
2148.3	2148.85	4.5515
2148.85	2149.4	3.69874
2149.4	2149.95	4.75111
2150.5	2151.05	3.14206
2151.05	2151.6	3.93448
2151.6	2152.15	4.01956
2152.15	2152.7	3.83644
2152.7	2153.25	4.51356
2153.25	2153.8	4.95066
2153.8	2154.35	5.20871
2154.35	2154.9	3.75941
2154.9	2155.45	3.42584
2155.45	2156	2.85309
2156	2156.55	2.89044
2156.55	2157.1	3.34578
2157.1	2157.65	4.23133
2157.65	2158.2	5.02863
2158.2	2158.75	6.90055
2158.75	2159.3	6.56976
2159.3	2159.85	7.9947
2159.85	2160.4	7.37347
2160.4	2160.95	7.27439
2160.95	2161.5	8.24169
2161.5	2162.05	6.52505
2162.05	2162.6	6.75046
2162.6	2163.15	8.04292
2163.15	2163.7	7.92283
2163.7	2164.25	7.8349
2164.25	2164.8	8.21024
2164.8	2165.35	7.15129
2165.35	2165.9	7.43322
2165.9	2166.45	7.80845
2166.45	2167	8.46678
2167	2167.55	6.36031
2167.55	2168.1	6.96681
2168.1	2168.65	6.98791
2168.65	2169.2	5.21511
2169.2	2169.75	7.71551
2169.75	2170.3	7.40241
2170.3	2170.85	6.58828
2170.85	2171.4	6.07999
2171.4	2171.95	4.50396
2171.95	2172.5	3.00622
2172.5	2173.05	4.52324
2173.6	2174.15	3.66686
2174.15	2174.7	5.11645
2174.7	2175.25	6.06797
2175.25	2175.8	5.08675
2175.8	2176.35	5.97023
2176.35	2176.9	7.4746
2176.9	2177.45	6.60977
2177.45	2178	6.00668
2178	2178.55	4.80909
2178.55	2179.1	4.92365
2179.1	2179.65	4.88464
2179.65	2180.2	5.72889
2180.2	2180.75	5.87872
2180.75	2181.3	6.19814
2181.3	2181.85	4.5654
2181.85	2182.4	4.53417
2182.4	2182.95	4.22185
2182.95	2183.5	5.38755
2183.5	2184.05	5.52154
2184.05	2184.6	4.73468
2184.6	2185.15	6.37148
2185.15	2185.7	5.82601
2185.7	2186.25	5.79023
2186.25	2186.8	4.46096
2186.8	2187.35	4.93583
2187.35	2187.9	5.34493
2187.9	2188.45	5.70443
2188.45	2189	5.94778
2189	2189.55	4.76406
2189.55	2190.1	3.59927
2190.1	2190.65	3.03403
2190.65	2191.2	4.94782
2191.2	2191.75	4.00053
2191.75	2192.3	4.60459
2192.3	2192.85	4.65503
2192.85	2193.4	5.16785
2193.4	2193.95	3.70805
2193.95	2194.5	4.44365
2194.5	2195.05	4.64241
2195.05	2195.6	4.46743
2195.6	2196.15	3.8172
2196.15	2196.7	3.76073
2196.7	2197.25	3.44424
2197.25	2197.8	4.78171
2197.8	2198.35	4.17039
2198.35	2198.9	5.25474
2198.9	2199.45	3.81675
2199.45	2200	4.3313
2200	2200.55	3.50948
2200.55	2201.1	3.43694
2201.1	2201.65	4.33797
2201.65	2202.2	3.65308
2202.2	2202.75	3.65334
2202.75	2203.3	4.62149
2203.3	2203.85	4.81603
2203.85	2204.4	3.31273
2204.4	2204.95	4.49962
2204.95	2205.5	4.09517
2205.5	2206.05	3.32236
2206.05	2206.6	4.71042
2206.6	2207.15	4.5156
2207.15	2207.7	3.87111
2215.4	2215.95	4.35774
2221.45	2222	3.94568
2222.55	2223.1	6.61158
2224.75	2225.3	7.43076
2226.4	2226.95	7.75848
2226.95	2227.5	7.76994
2227.5	2228.05	7.68851
2228.05	2228.6	7.40357
2228.6	2229.15	7.32781
2229.15	2229.7	7.48884
2229.7	2230.25	8.25409
2230.25	2230.8	6.89715
2230.8	2231.35	8.39214
2231.35	2231.9	7.96202
2231.9	2232.45	7.17943
2232.45	2233	7.17219
2233	2233.55	8.08076
2233.55	2234.1	6.82657
2234.1	2234.65	7.8953
2234.65	2235.2	8.65535
2235.2	2235.75	7.5278
2235.75	2236.3	7.53821
2236.3	2236.85	7.39372
2236.85	2237.4	7.89891
2237.4	2237.95	8.60799
2237.95	2238.5	7.83907
2238.5	2239.05	8.35171
2239.05	2239.6	8.21417
2239.6	2240.15	7.68607
2240.15	2240.7	8.13745
2240.7	2241.25	7.19277
2241.25	2241.8	7.5954
2241.8	2242.35	6.23887
2242.35	2242.9	6.93247
2242.9	2243.45	5.79407
2243.45	2244	4.85537
2244	2244.55	5.76863
2244.55	2245.1	4.94894
2245.1	2245.65	6.35662
2245.65	2246.2	6.29803
2246.2	2246.75	5.98271
2246.75	2247.3	6.22157
2247.3	2247.85	4.091
2247.85	2248.4	6.35521
2248.4	2248.95	4.48375
2248.95	2249.5	3.87652
2249.5	2250.05	3.80525
2250.05	2250.6	4.80531
2250.6	2251.15	4.06498
2251.15	2251.7	3.25138
2251.7	2252.25	4.71979
2252.25	2252.8	4.78729
2252.8	2253.35	6.0183
2253.35	2253.9	5.52947
2253.9	2254.45	4.73366
2254.45	2255	3.70517
2255	2255.55	4.90385
2255.55	2256.1	3.74278
2256.1	2256.65	4.73022
2256.65	2257.2	4.41189
2257.2	2257.75	7.13409
2257.75	2258.3	7.12801
2258.3	2258.85	7.82174
2258.85	2259.4	7.55281
2259.4	2259.95	7.88554
2259.95	2260.5	7.14854
2260.5	2261.05	6.87507
2261.05	2261.6	6.69034
2261.6	2262.15	5.16355
2262.15	2262.7	5.77514
2262.7	2263.25	5.09086
2263.25	2263.8	5.72385
2263.8	2264.35	5.61975
2264.35	2264.9	4.28814
2264.9	2265.45	5.57293
2265.45	2266	5.43399
2266	2266.55	5.42808
2266.55	2267.1	6.09161
2267.1	2267.65	6.97635
2267.65	2268.2	6.46438
2268.2	2268.75	6.66952
2268.75	2269.3	6.14532
2269.3	2269.85	5.13793
2269.85	2270.4	6.66669
2270.4	2270.95	6.20325
2270.95	2271.5	6.49408
2271.5	2272.05	6.39464
2272.05	2272.6	5.68386
2272.6	2273.15	6.41495
2273.15	2273.7	6.03557
2273.7	2274.25	6.4779
2274.25	2274.8	5.69174
2274.8	2275.35	5.83079
2275.35	2275.9	5.56685
2275.9	2276.45	5.41426
2276.45	2277	6.30469
2277	2277.55	5.51156
2277.55	2278.1	5.19152
2278.1	2278.65	5.34884
2278.65	2279.2	5.70168
2279.2	2279.75	5.8999
2279.75	2280.3	5.09151
2280.3	2280.85	5.93398
2280.85	2281.4	6.76795
2281.4	2281.95	6.07755
2281.95	2282.5	5.87397
2282.5	2283.05	5.24342
2283.05	2283.6	6.04038
2283.6	2284.15	5.38039
2284.15	2284.7	6.36653
2284.7	2285.25	4.41115
2285.25	2285.8	5.64903
2285.8	2286.35	5.16635
2286.35	2286.9	5.05624
2286.9	2287.45	5.46495
2287.45	2288	4.91391
2288	2288.55	5.41668
2288.55	2289.1	6.38816
2289.1	2289.65	6.37036
2289.65	2290.2	5.73747
2290.2	2290.75	6.8909
2290.75	2291.3	5.31173
2291.3	2291.85	5.43269
2291.85	2292.4	6.06902
2292.4	2292.95	5.78701
2292.95	2293.5	5.86781
2293.5	2294.05	7.02504
2294.05	2294.6	5.95328
2294.6	2295.15	6.20688
2295.15	2295.7	6.43819
2295.7	2296.25	5.62342
2296.25	2296.8	4.22668
2296.8	2297.35	5.15533
2297.35	2297.9	5.07256
2297.9	2298.45	4.79046
2298.45	2299	4.69844
2299	2299.55	4.37433
2299.55	2300.1	4.61415
2300.1	2300.65	5.21049
2300.65	2301.2	4.9441
2301.2	2301.75	5.36239
2301.75	2302.3	4.63421
2302.3	2302.85	3.44464
2302.85	2303.4	5.20013
2303.4	2303.95	4.69
2303.95	2304.5	4.87106
2304.5	2305.05	5.27302
2305.05	2305.6	5.03274
2305.6	2306.15	4.97499
2306.15	2306.7	4.69388
2306.7	2307.25	5.04004
2307.25	2307.8	5.22236
2307.8	2308.35	5.23046
2308.35	2308.9	4.94748
2308.9	2309.45	5.41211
2309.45	2310	4.89039
2309.45	2310	5.41832
2310	2310.55	4.49653
2310.55	2311.1	5.30441
2311.1	2311.65	5.58974
2311.65	2312.2	5.50612
2312.2	2312.75	5.00611
2312.75	2313.3	5.24654
2313.3	2313.85	5.93352
2313.85	2314.4	5.0296
2314.4	2314.95	6.2218
2314.95	2315.5	4.83752
2315.5	2316.05	5.61179
2316.05	2316.6	5.56268
2316.6	2317.15	5.82146
2317.15	2317.7	5.71101
2317.7	2318.25	4.64453
2318.25	2318.8	5.47394
2318.8	2319.35	6.03359
2319.35	2319.9	5.2167
2319.9	2320.45	6.08267
2320.45	2321	4.91767
2321	2321.55	5.0583
2321.55	2322.1	4.34829
2322.1	2322.65	5.30376
2322.65	2323.2	6.02959
2323.2	2323.75	4.53421
2323.75	2324.3	4.65505
2324.3	2324.85	4.94587
2324.85	2325.4	5.3267
2325.4	2325.95	5.54294
2325.95	2326.5	4.00585
2326.5	2327.05	4.90205
2327.05	2327.6	5.06952
2327.6	2328.15	4.5685
2328.15	2328.7	5.27898
2328.7	2329.25	5.31609
2329.25	2329.8	4.96744
2329.8	2330.35	4.40518
2330.35	2330.9	4.153
2330.9	2331.45	4.85453
2331.45	2332	6.26842
2332	2332.55	4.18546
2332.55	2333.1	5.16358
2333.1	2333.65	5.24541
2333.65	2334.2	3.86599
2334.2	2334.75	5.96713
2334.75	2335.3	6.59454
2335.3	2335.85	5.14877
2335.85	2336.4	5.62756
2336.4	2336.95	5.64509
2336.95	2337.5	4.59899
2337.5	2338.05	5.5718
2338.05	2338.6	5.28507
2338.6	2339.15	5.05466
2339.15	2339.7	6.1544
2339.7	2340.25	5.64714
2340.25	2340.8	7.69765
2340.8	2341.35	8.86453
2341.35	2341.9	6.02098
2341.9	2342.45	5.6857
2342.45	2343	5.29396
2343	2343.55	4.31294
2343.55	2344.1	4.77629
2344.1	2344.65	6.2817
2344.65	2345.2	4.70815
2345.2	2345.75	7.47506
2345.75	2346.3	9.61388
2346.3	2346.85	9.86637
2346.85	2347.4	7.11224
2347.4	2347.95	8.87239
2347.95	2348.5	8.68971
2348.5	2349.05	9.35971
2349.05	2349.6	8.28362
2349.6	2350.15	8.93026
2350.15	2350.7	9.10122
2350.7	2351.25	8.21523
2350.7	2351.25	8.03903
2351.25	2351.8	8.89509
2351.8	2352.35	7.46064
2352.35	2352.9	9.00654
2352.9	2353.45	9.18098
2353.45	2354	6.35198
2354	2354.55	3.69749
2354.55	2355.1	4.61479
2355.1	2355.65	7.49009
2355.65	2356.2	8.02999
2356.2	2356.75	8.86932
2356.75	2357.3	8.1735
2357.3	2357.85	9.41326
2357.85	2358.4	8.50251
2358.4	2358.95	8.38084
2358.95	2359.5	7.50842
2359.5	2360.05	7.44992
2360.05	2360.6	4.10909
2360.6	2361.15	3.71844
2361.15	2361.7	4.8638
2361.7	2362.25	4.67538
2362.25	2362.8	4.28149
2362.8	2363.35	4.83442
2363.35	2363.9	4.88433
2363.9	2364.45	5.41363
2364.45	2365	4.46402
2365	2365.55	4.06296
2365.55	2366.1	6.68651
2366.1	2366.65	9.21896
2367.2	2367.75	6.7945
2368.85	2369.4	8.0919
2369.95	2370.5	7.87493
2370.5	2371.05	7.71335
2371.05	2371.6	8.43741
2371.6	2372.15	7.91314
2372.15	2372.7	7.32887
2372.7	2373.25	8.5807
2373.25	2373.8	8.01269
2373.8	2374.35	7.34782
2374.35	2374.9	8.20408
2374.9	2375.45	6.85465
2375.45	2376	6.7453
2376	2376.55	5.6564
2376.55	2377.1	5.134
2377.1	2377.65	5.02607
2377.65	2378.2	1.62311
2378.2	2378.75	4.97276
2378.75	2379.3	6.32051
2379.3	2379.85	7.27091
2379.85	2380.4	6.28772
2380.4	2380.95	6.21339
2380.95	2381.5	5.94176
2381.5	2382.05	5.90954
2382.05	2382.6	5.15764
2382.6	2383.15	6.36655
2383.15	2383.7	7.00276
2383.7	2384.25	6.62856
2384.25	2384.8	6.14458
2384.8	2385.35	6.35353
2385.35	2385.9	6.64503
2385.9	2386.45	5.45453
2386.45	2387	7.12602
2387	2387.55	5.97273
2387.55	2388.1	6.2083
2388.1	2388.65	6.12505
2388.65	2389.2	5.62112
2389.2	2389.75	6.03496
2389.75	2390.3	6.73937
2390.3	2390.85	7.54983
2390.85	2391.4	6.00021
2391.4	2391.95	5.29108
2391.95	2392.5	5.12921
2392.5	2393.05	4.25395
2393.05	2393.6	5.80598
2393.6	2394.15	5.26419
2394.15	2394.7	5.5756
2394.7	2395.25	5.26011
2395.25	2395.8	4.79607
2395.8	2396.35	4.68559
2396.35	2396.9	5.23019
2396.9	2397.45	7.36879
2397.45	2398	4.84173
2398	2398.55	4.80124
2398.55	2399.1	7.09477
2399.1	2399.65	8.22694
2399.65	2400.2	9.14634
2400.2	2400.75	7.75848
2400.75	2401.3	5.52001
2401.3	2401.85	3.56538
2401.85	2402.4	4.22586
2402.4	2402.95	8.50041
2402.95	2403.5	8.16379
2403.5	2404.05	9.04606
2404.05	2404.6	9.07668
2404.6	2405.15	8.29779
2405.15	2405.7	9.34084
2405.7	2406.25	6.57986
2406.25	2406.8	6.19156
2406.8	2407.35	4.9374
2407.35	2407.9	4.64667
2407.9	2408.45	5.32762
2408.45	2409	4.72524
2409	2409.55	4.979
2409.55	2410.1	5.25329
2410.1	2410.65	6.2004
2410.65	2411.2	5.49273
2411.2	2411.75	5.35166
2411.75	2412.3	4.81731
2412.3	2412.85	5.23548
2412.85	2413.4	3.15295
2413.4	2413.95	4.89279
2413.95	2414.5	4.80819
2414.5	2415.05	5.24453
2415.05	2415.6	8.40866
2415.6	2416.15	8.87344
2416.15	2416.7	8.29988
2416.7	2417.25	9.32121
2417.25	2417.8	7.07244
2417.8	2418.35	5.72611
2418.35	2418.9	4.45089
2418.9	2419.45	3.69151
2419.45	2420	4.5109
2420	2420.55	3.50308
2420.55	2421.1	7.7708
2421.1	2421.65	7.70276
2421.65	2422.2	7.88328
2422.2	2422.75	8.92857
2422.75	2423.3	8.88604
2423.3	2423.85	8.50483
2423.85	2424.4	8.56945
2424.4	2424.95	7.70246
2424.95	2425.5	8.58282
2425.5	2426.05	7.94429
2426.05	2426.6	8.31154
2426.6	2427.15	8.20993
2427.15	2427.7	8.37786
2427.7	2428.25	8.89472
2428.25	2428.8	8.3439
2428.8	2429.35	8.84745
2429.35	2429.9	8.81975
2429.9	2430.45	9.05109
2430.45	2431	8.84118
2431	2431.55	8.14553
2431.55	2432.1	8.58545
2432.1	2432.65	8.60218
2432.65	2433.2	8.56018
2433.2	2433.75	6.51292
2433.75	2434.3	7.95174
2434.3	2434.85	8.85851
2434.85	2435.4	8.2654
2435.4	2435.95	8.69156
2435.95	2436.5	8.05626
2436.5	2437.05	9.39516
2437.05	2437.6	8.39515
2437.6	2438.15	8.54098
2438.15	2438.7	8.82579
2438.7	2439.25	8.60718
2439.25	2439.8	8.31137
2439.8	2440.35	9.2136
2440.9	2441.45	7.95581
2442	2442.55	8.70229
2443.1	2443.65	8.29477
2444.2	2444.75	8.48465
2445.3	2445.85	8.78667
2446.4	2446.95	8.40716
2447.5	2448.05	8.23008
2448.6	2449.15	8.27306
2449.7	2450.25	8.38113
2450.8	2451.35	8.69994
2451.9	2452.45	7.93213
2453	2453.55	8.09017
2454.1	2454.65	7.9787
2455.2	2455.75	8.15316
2456.3	2456.85	8.39119
2457.4	2457.95	7.90484
2475.55	2476.1	7.98986
2476.65	2477.2	7.09937
2477.75	2478.3	8.48899
2478.85	2479.4	8.24299
2479.95	2480.5	8.19466
2479.95	2480.5	7.4498
2481.05	2481.6	8.65079
2482.15	2482.7	7.78952
2483.25	2483.8	7.79458
2484.35	2484.9	8.20672
2485.45	2486	8.17998
2486.55	2487.1	8.13757
2487.65	2488.2	7.79441
2488.75	2489.3	8.00497
2489.85	2490.4	7.82316
2490.95	2491.5	8.0289
2492.05	2492.6	8.22496
2493.15	2493.7	8.71468
2494.25	2494.8	8.09785
2495.35	2495.9	7.58035
2496.45	2497	7.71598
2497.55	2498.1	7.25128
2550.9	2551.45	7.18954
2552	2552.55	6.93012
2553.1	2553.65	6.64276
2554.2	2554.75	7.02519
2555.3	2555.85	7.07364
2556.4	2556.95	6.86597
2557.5	2558.05	7.00004
2558.6	2559.15	6.88307
2559.7	2560.25	7.05596
2560.8	2561.35	6.9399
2561.9	2562.45	6.54014
2563	2563.55	7.04755
2564.1	2564.65	6.42619
2565.2	2565.75	7.14265
2566.3	2566.85	6.96228
2567.4	2567.95	5.16001
2568.5	2569.05	6.82924
2569.6	2570.15	6.98344
2570.7	2571.25	7.2944
2571.8	2572.35	6.98538
2572.9	2573.45	7.01147
2582.8	2583.35	9.98456
2583.9	2584.45	10.1145
2585	2585.55	10.3538
2586.1	2586.65	10.3533
2587.2	2587.75	10.4484
2588.3	2588.85	9.96526
2589.4	2589.95	9.55367
2590.5	2591.05	9.06231
2591.05	2591.6	8.83697
2591.6	2592.15	8.27253
2592.15	2592.7	8.07625
2592.7	2593.25	7.36608
2593.25	2593.8	6.92621
2593.8	2594.35	7.09235
2594.35	2594.9	8.28334
2594.9	2595.45	9.17024
2595.45	2596	9.76411
2596	2596.55	9.63382
2596.55	2597.1	9.39342
2597.1	2597.65	9.0491
2597.65	2598.2	8.87177
2598.2	2598.75	7.92133
2598.75	2599.3	8.44971
2599.3	2599.85	8.96362
2599.85	2600.4	8.80377
2600.4	2600.95	8.63698
2617.45	2618	8.45458
2625.15	2625.7	8.82593
2641.1	2641.65	8.52701

## Sheet: 17O-excess
depth_top (m)	depth_bot (m)	17O-excess (ppm)
1353	1352.45	39.3245
1355.75	1355.2	43.5254
1358.5	1357.95	38.2754
1361.25	1360.7	43.9207
1364	1363.45	44.8597
1366.75	1366.2	42.1744
1369.5	1368.95	40.6208
1372.25	1371.7	37.0344
1375	1374.45	38.3039
1377.75	1377.2	48.5802
1380.5	1379.95	42.2998
1383.25	1382.7	30.1237
1386	1385.45	40.5075
1392.05	1391.5	42.5365
1394.25	1393.7	47.3534
1397	1396.45	43.4416
1399.75	1399.2	41.4028
1402.5	1401.95	39.8359
1405.25	1404.7	38.3994
1408	1407.45	37.9427
1410.2	1409.65	45.4759
1413.5	1412.95	39.4499
1416.25	1415.7	49.9006
1419	1418.45	42.3211
1421.75	1421.2	48.5868
1423.95	1423.4	40.9512
1427.25	1426.7	35.9845
1430	1429.45	43.4161
1432.75	1432.2	57.7115
1435.5	1434.95	45.3022
1438.25	1437.7	31.6591
1441	1440.45	36.259
1443.75	1443.2	39.4099
1446.5	1445.95	34.0201
1449.25	1448.7	35.6366
1452	1451.45	31.4027
1454.75	1454.2	43.8934
1458.05	1457.5	41.8867
1463	1462.45	50.3639
1464.1	1463.55	38.6896
1464.65	1464.1	38.8434
1465.2	1464.65	41.6708
1465.75	1465.2	39.034
1466.3	1465.75	29.1483
1466.85	1466.3	32.1649
1467.4	1466.85	34.5336
1467.95	1467.4	43.3626
1469.05	1468.5	43.0471
1469.6	1469.05	45.5005
1470.15	1469.6	50.5465
1470.7	1470.15	31.5354
1471.25	1470.7	30.8163
1471.8	1471.25	38.4475
1472.35	1471.8	19.9322
1472.9	1472.35	38.2756
1473.45	1472.9	30.5239
1474	1473.45	45.5025
1475.1	1474.55	50.8044
1475.65	1475.1	40.66
1476.2	1475.65	44.872
1476.75	1476.2	50.6369
1477.3	1476.75	43.3227
1477.85	1477.3	38.0878
1478.4	1477.85	31.4591
1478.95	1478.4	35.4854
1479.5	1478.95	44.4756
1480.05	1479.5	33.7365
1480.6	1480.05	28.3466
1481.15	1480.6	42.5208
1481.7	1481.15	16.0721
1482.8	1482.25	36.4903
1483.35	1482.8	47.9441
1483.9	1483.35	43.9378
1484.45	1483.9	22.9023
1485	1484.45	38.0553
1485.55	1485	31.9845
1486.1	1485.55	37.3106
1486.65	1486.1	42.8879
1487.2	1486.65	30.6862
1487.75	1487.2	33.424
1488.3	1487.75	44.9975
1489.4	1488.85	40.0532
1489.95	1489.4	30.2132
1490.5	1489.95	17.275
1491.05	1490.5	30.2556
1491.6	1491.05	29.3635
1492.15	1491.6	20.5574
1492.7	1492.15	7.36499
1493.25	1492.7	16.2178
1493.8	1493.25	28.164
1494.35	1493.8	11.9025
1494.9	1494.35	33.5906
1495.45	1494.9	30.4416
1496	1495.45	17.4977
1496.55	1496	24.1909
1497.1	1496.55	12.8267
1497.65	1497.1	23.5844
1498.75	1498.2	24.0518
1499.3	1498.75	18.3553
1499.85	1499.3	24.957
1500.4	1499.85	18.6648
1500.95	1500.4	39.3549
1501.5	1500.95	19.0684
1502.05	1501.5	25.0337
1502.6	1502.05	28.363
1503.15	1502.6	17.5978
1503.7	1503.15	13.7896
1504.25	1503.7	24.6177
1504.8	1504.25	26.5549
1505.35	1504.8	19.4445
1505.9	1505.35	16.717
1506.45	1505.9	20.4245
1507	1506.45	57.0169
1508.1	1507.55	12.7723
1508.65	1508.1	30.4277
1509.2	1508.65	26.0437
1509.75	1509.2	24.5642
1510.3	1509.75	26.8968
1510.85	1510.3	23.2219
1511.4	1510.85	43.3374
1511.95	1511.4	26.5227
1512.5	1511.95	35.7993
1513.05	1512.5	15.3138
1513.6	1513.05	18.9082
1514.15	1513.6	36.629
1514.7	1514.15	25.4923
1515.8	1515.25	26.3561
1516.35	1515.8	26.0221
1516.9	1516.35	14.6926
1517.45	1516.9	17.1256
1518	1517.45	21.7325
1519.1	1518.55	16.4724
1519.65	1519.1	22.0269
1520.2	1519.65	17.0772
1520.75	1520.2	16.1514
1521.3	1520.75	20.2737
1521.85	1521.3	22.53
1522.4	1521.85	9.25767
1522.95	1522.4	24.6458
1523.5	1522.95	17.5555
1524.05	1523.5	20.937
1524.6	1524.05	29.0086
1525.15	1524.6	26.4349
1526.25	1525.7	35.7153
1526.8	1526.25	25.3719
1527.35	1526.8	27.7392
1527.9	1527.35	32.7708
1528.45	1527.9	37.8192
1529	1528.45	35.8079
1529.55	1529	29.2422
1530.1	1529.55	47.4735
1530.65	1530.1	23.4623
1531.2	1530.65	19.7454
1531.75	1531.2	34.4862
1532.3	1531.75	32.557
1532.85	1532.3	33.1183
1533.4	1532.85	31.3444
1533.95	1533.4	28.3153
1534.5	1533.95	18.4739
1535.05	1534.5	25.5994
1535.6	1535.05	34.7038
1536.15	1535.6	18.5879
1536.7	1536.15	18.3864
1537.25	1536.7	23.9508
1537.8	1537.25	35.4442
1538.35	1537.8	35.4261
1539.45	1538.9	17
1540	1539.45	30.4353
1541.1	1540.55	27.7001
1542.2	1541.65	26.7248
1543.3	1542.75	38.3094
1544.4	1543.85	48.8287
1544.95	1544.4	29.122
1545.5	1544.95	26.656
1547.15	1546.6	34.7563
1547.7	1547.15	33.8263
1548.25	1547.7	30.6427
1550.45	1549.9	30.6133
1551	1550.45	37.017
1552.1	1551.55	28.9166
1552.65	1552.1	34.7339
1553.2	1552.65	35
1554.3	1553.75	33.1819
1554.85	1554.3	24.2936
1556.5	1555.95	26.2813
1557.05	1556.5	33.0353
1558.15	1557.6	30.4393
1558.7	1558.15	43.7388
1559.25	1558.7	28.9975
1560.35	1559.8	42.1893
1562.55	1562	29.6321
1563.1	1562.55	43
1563.65	1563.1	38.2547
1565.3	1564.75	27
1565.85	1565.3	32.9188
1566.95	1566.4	36.2042
1568.05	1567.5	40.0095
1569.15	1568.6	35.2613
1569.7	1569.15	40.192
1571.35	1570.8	42.1297
1571.9	1571.35	25.5992
1573.55	1573	23.3331
1574.65	1574.1	31.3903
1575.75	1575.2	25.1441
1579.05	1578.5	25.92
1579.6	1579.05	40.7188
1580.7	1580.15	38.8052
1581.8	1581.25	36.8589
1582.9	1582.35	43.2177
1584	1583.45	38.0597
1585.1	1584.55	49.9515
1588.4	1587.85	55.3197
1590.05	1589.5	41.2871
1590.6	1590.05	35.3179
1594.45	1593.9	37.6698
1595	1594.45	38.8171
1595.55	1595	48.5961
1598.3	1597.75	49.7042
1599.4	1598.85	38.4813
1600.5	1599.95	43.5865
1604.35	1603.8	25.4669
1605.45	1604.9	33.2086
1606	1605.45	34.6789
1607.1	1606.55	23.624
1608.2	1607.65	34.3033
1608.75	1608.2	38.4369
1609.3	1608.75	18.7717
1611.5	1610.95	31.1347
1614.25	1613.7	27.4917
1614.8	1614.25	34.1864
1615.35	1614.8	20.7327
1616.45	1615.9	20.5357
1617.55	1617	15.4057
1618.65	1618.1	26.3151
1619.2	1618.65	18.6612
1619.75	1619.2	26.1203
1620.3	1619.75	19.1871
1620.85	1620.3	25.5225
1621.4	1620.85	18.6782
1621.95	1621.4	24.6659
1622.5	1621.95	34.9733
1623.05	1622.5	28.1726
1623.6	1623.05	24.5921
1624.7	1624.15	17.0243
1625.25	1624.7	24.3503
1625.8	1625.25	31.5499
1626.35	1625.8	23.4184
1626.9	1626.35	21.3827
1627.45	1626.9	30.8336
1628	1627.45	23.8236
1628.55	1628	28.2701
1629.1	1628.55	27.9502
1629.65	1629.1	28
1630.2	1629.65	22.169
1630.75	1630.2	28.1205
1631.3	1630.75	28.1507
1632.4	1631.85	24.3576
1632.95	1632.4	23.1869
1633.5	1632.95	27.6083
1634.05	1633.5	28
1635.15	1634.6	19.2798
1635.7	1635.15	23.1132
1636.25	1635.7	20.9239
1636.8	1636.25	29.8989
1637.35	1636.8	18.9269
1637.9	1637.35	22.3405
1638.45	1637.9	26.4694
1639	1638.45	24.6844
1639.55	1639	37.9784
1640.1	1639.55	20.0419
1640.65	1640.1	30.5915
1641.2	1640.65	31.7044
1641.75	1641.2	31.4669
1642.3	1641.75	28.3823
1642.85	1642.3	24.3018
1643.4	1642.85	30.1513
1643.95	1643.4	32.2795
1644.5	1643.95	29.3814
1645.05	1644.5	37.8755
1645.6	1645.05	23.7789
1646.15	1645.6	27.1599
1646.7	1646.15	37
1647.25	1646.7	44.3663
1647.8	1647.25	29.7013
1648.35	1647.8	31.8568
1648.9	1648.35	27.8732
1649.45	1648.9	35.78
1650	1649.45	29.3484
1650.55	1650	32.1695
1651.1	1650.55	41.1245
1651.65	1651.1	41.6496
1652.2	1651.65	35.1858
1653.3	1652.75	36.1478
1653.85	1653.3	29.3142
1654.4	1653.85	22.2291
1654.95	1654.4	39.7252
1655.5	1654.95	33.7848
1656.05	1655.5	35.802
1656.6	1656.05	35.4955
1657.15	1656.6	18.2446
1657.7	1657.15	37.8506
1658.25	1657.7	39.2115
1658.8	1658.25	32.7733
1659.35	1658.8	32.8199
1659.9	1659.35	34.3738
1660.45	1659.9	24.8931
1661	1660.45	42.0277
1662.1	1661.55	30.1082
1662.65	1662.1	31.8001
1663.2	1662.65	39.2269
1663.75	1663.2	35.6719
1664.3	1663.75	39.5416
1664.85	1664.3	41.7854
1665.4	1664.85	29.3414
1665.95	1665.4	25.7859
1666.5	1665.95	44.3598
1667.05	1666.5	45.3384
1667.6	1667.05	35.5418
1668.15	1667.6	41.146
1668.7	1668.15	42.9708
1669.8	1669.25	39.4529
1670.35	1669.8	32.1739
1670.9	1670.35	36.1953
1671.45	1670.9	32.2666
1672	1671.45	33.4853
1672.55	1672	47.9912
1674.2	1673.65	33.3617
1674.75	1674.2	40.4753
1675.3	1674.75	39.8888
1676.4	1675.85	48.185
1677.5	1676.95	30.2992
1678.05	1677.5	31.1315
1678.6	1678.05	26.8961
1679.15	1678.6	38.872
1679.7	1679.15	45.9893
1680.25	1679.7	32.1902
1680.8	1680.25	33.6072
1681.35	1680.8	32.6886
1681.9	1681.35	31.8947
1682.45	1681.9	29.1905
1683	1682.45	48.7166
1683.55	1683	37.8924
1684.1	1683.55	44.8093
1684.65	1684.1	46.3538
1685.2	1684.65	44.4213
1685.75	1685.2	38.5487
1686.85	1686.3	33.3327
1687.95	1687.4	42.8006
1689.05	1688.5	37.7355
1689.6	1689.05	40.68
1690.15	1689.6	29.3835
1690.7	1690.15	40.6878
1691.25	1690.7	47.4671
1691.8	1691.25	32.5839
1692.35	1691.8	40.1076
1692.9	1692.35	41.7519
1693.45	1692.9	39.9152
1694	1693.45	39.8438
1694.55	1694	43.7255
1695.1	1694.55	42.2139
1695.65	1695.1	43.3966
1696.75	1696.2	49.5591
1697.3	1696.75	38.6947
1697.85	1697.3	39.9284
1698.4	1697.85	50.9415
1698.95	1698.4	38.2803
1699.5	1698.95	40.3176
1700.05	1699.5	37.8027
1700.6	1700.05	23.732
1701.15	1700.6	49.5458
1701.7	1701.15	55.6923
1702.25	1701.7	38.945
1702.8	1702.25	32.9885
1703.35	1702.8	39.6616
1703.9	1703.35	44.3773
1704.45	1703.9	49.5836
1705	1704.45	41.4181
1705.55	1705	38.6109
1706.1	1705.55	46.8258
1706.65	1706.1	37.8612
1707.2	1706.65	36.8003
1708.3	1707.75	38.3385
1708.85	1708.3	37.62
1709.4	1708.85	39.4857
1709.95	1709.4	40.7313
1710.5	1709.95	37.191
1711.05	1710.5	55.0936
1712.15	1711.6	46.0668
1712.7	1712.15	28.6261
1713.25	1712.7	47.3384
1713.8	1713.25	39.3005
1714.35	1713.8	41.0898
1714.9	1714.35	38.659
1716	1715.45	43.3997
1716.55	1716	47.6521
1717.1	1716.55	55.2306
1717.65	1717.1	53.2136
1718.2	1717.65	39.4258
1719.3	1718.75	44.0775
1719.85	1719.3	37.2394
1720.4	1719.85	29.5099
1720.95	1720.4	36.3776
1721.5	1720.95	32.904
1722.05	1721.5	49.1679
1722.6	1722.05	39.8648
1724.8	1724.25	36.5025
1725.9	1725.35	45.4932
1727	1726.45	33.6293
1727.55	1727	34.2847
1728.1	1727.55	26.22
1728.65	1728.1	36.6036
1730.3	1729.75	25.831
1732.5	1731.95	46.4126
1734.7	1734.15	37.3697
1735.25	1734.7	39.0845
1735.8	1735.25	51.1089
1736.9	1736.35	43.0448
1737.45	1736.9	35.3655
1739.1	1738.55	34.3479
1741.3	1740.75	38.3285
1741.85	1741.3	37.0528
1744.6	1744.05	45.891
1745.7	1745.15	41.0965
1746.8	1746.25	42.2331
1747.9	1747.35	31.422
1748.45	1747.9	46.0967
1750.1	1749.55	45.9669
1751.2	1750.65	54.5865
1751.75	1751.2	41.4943
1753.4	1752.85	41.7256
1753.95	1753.4	35.343
1754.5	1753.95	37.0349
1755.6	1755.05	39.8422
1756.15	1755.6	38.0976
1757.8	1757.25	35.9949
